# Supplementary material
Source: HighWire-hosted journal article supplement (https://diabetes.diabetesjournals.org/content/suppl/2008/03/04/db07-1639)

# Supplementary Figure 1.

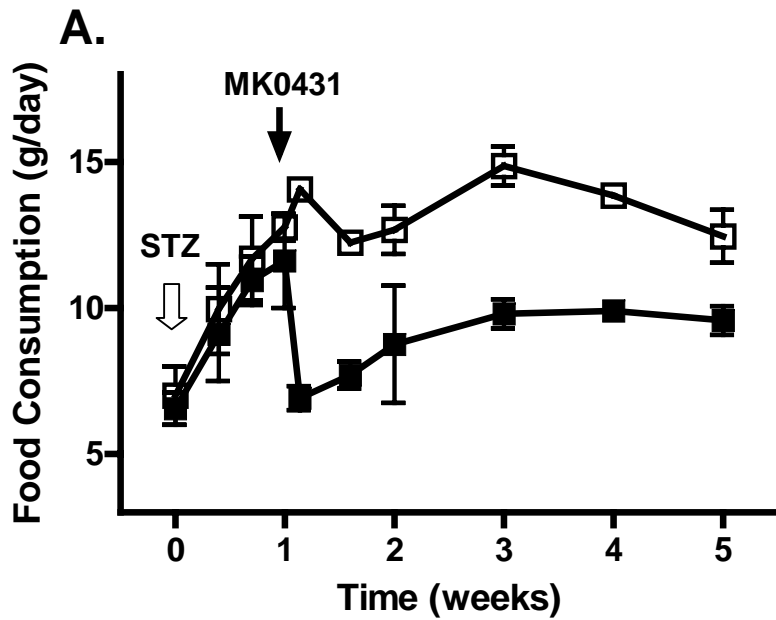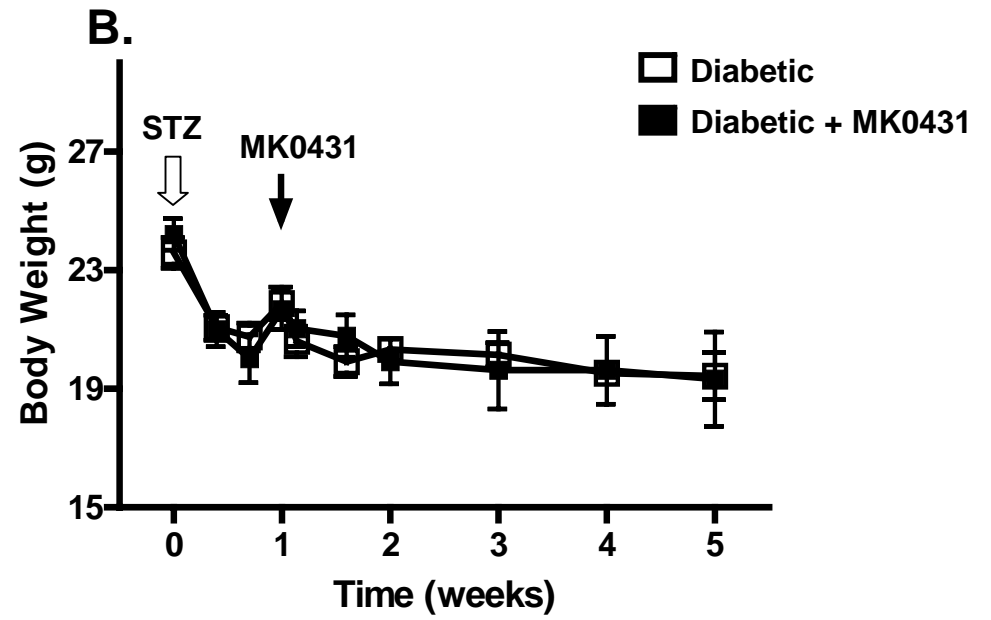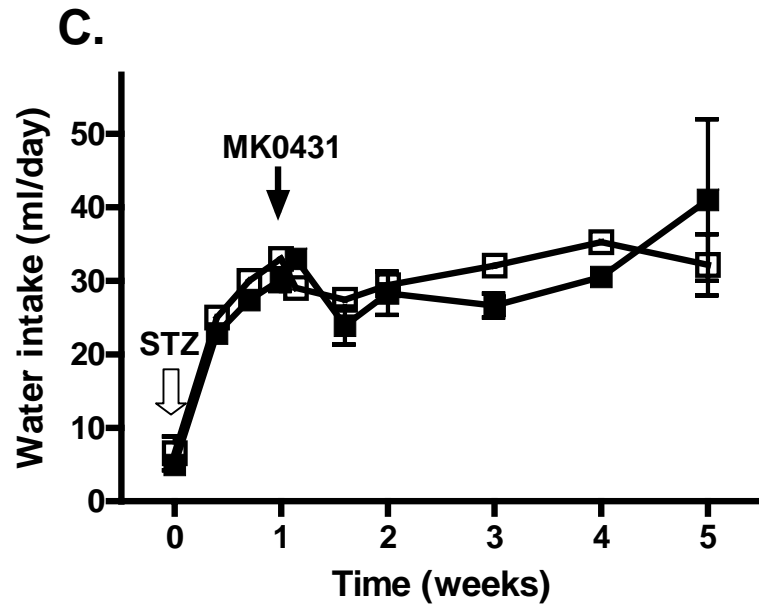

## Supplementary Figure 2.

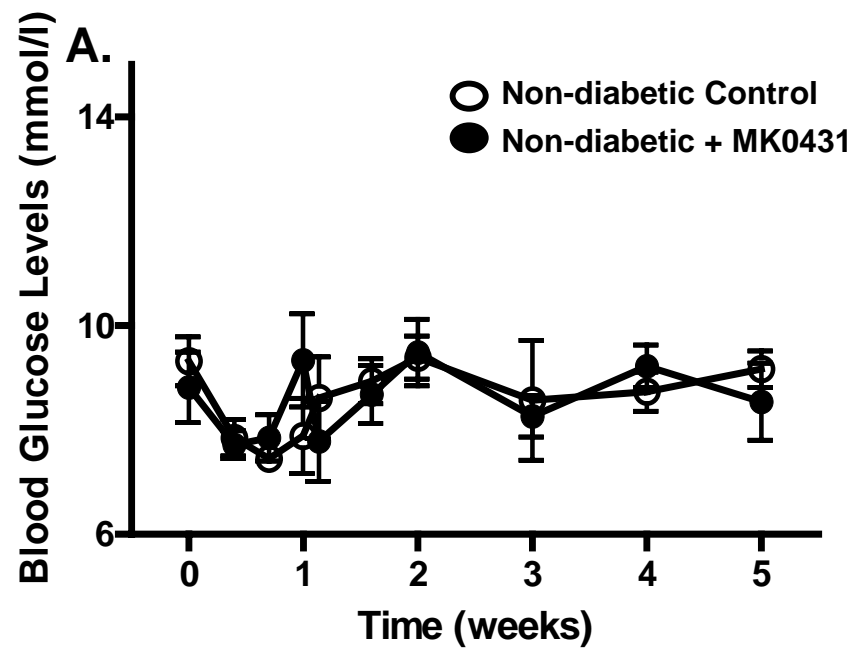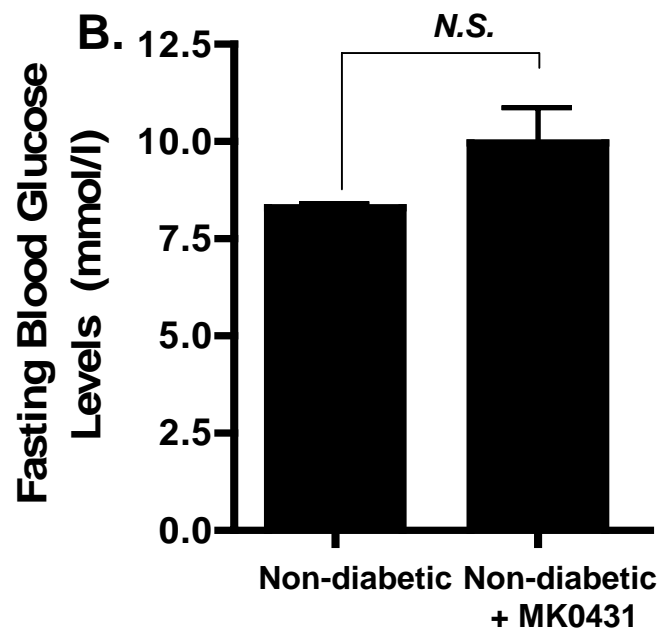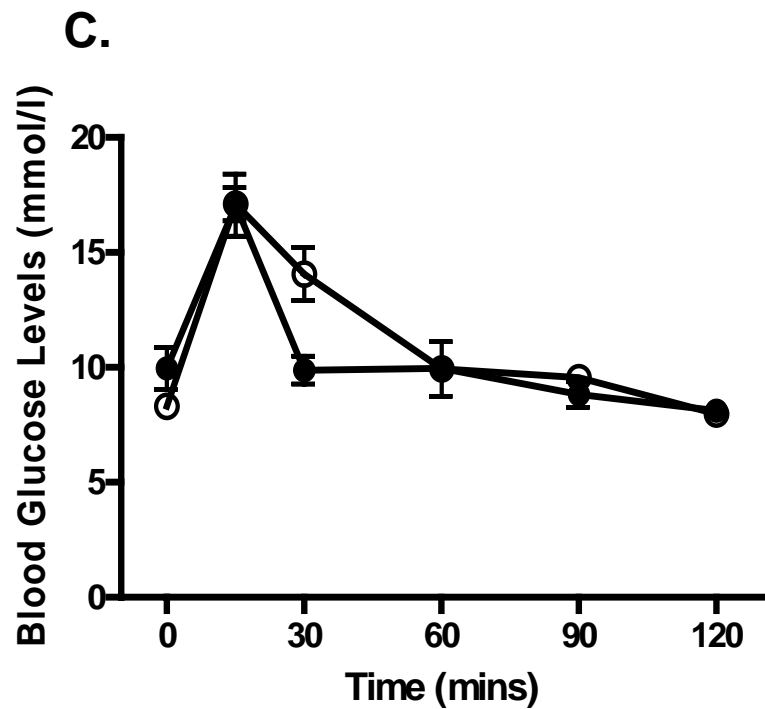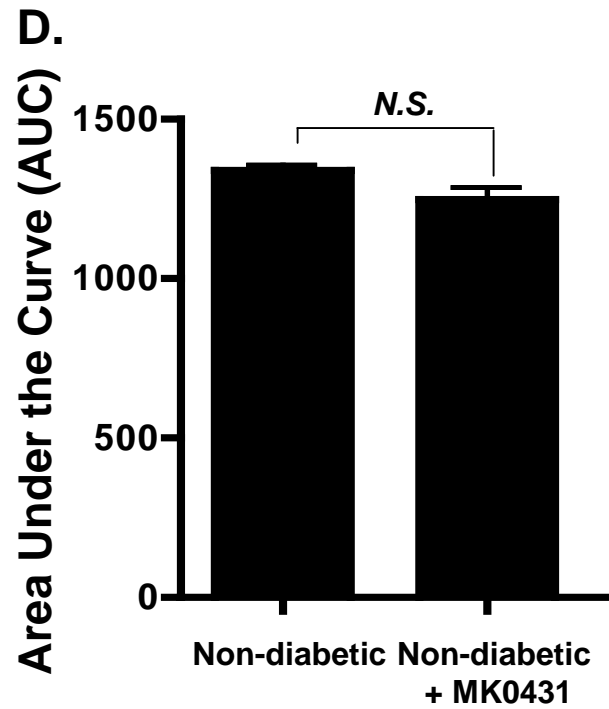

### Supplementary Figure 3.

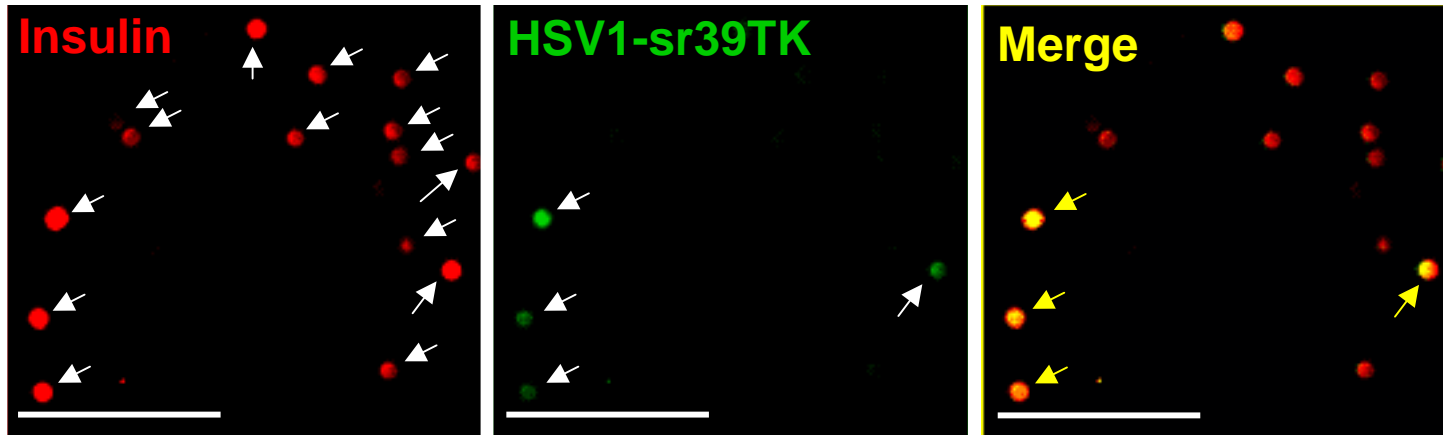

**TK<sup>+</sup>/Insulin<sup>+</sup> = 4/15 ( ~ 27 %)**

Supplement: db071639onlineappendix.pdf [file db071639onlineappendix.pdf]
